# Supplementary material for: Mechanistic Aspects of the Palladium‐Catalyzed Suzuki‐Miyaura Cross‐Coupling Reaction
Source: PubMed Central journal article supplement (PMC8518397; doi:10.1002/chem.202101880), 2021-08-09
Supplement: CHEM-27-13481-s001.pdf [file CHEM-27-13481-s001.pdf]

## **Author Contributions**

M.D. Writing – original draft:Equal

ÈricC.-C. Writing – original draft:Equal

N.T. Writing – original draft:Supporting; Writing – review & editing:Supporting

G.T. Writing – review & editing:Equal

S.N. Writing – review & editing:Lead

A.P. Writing – original draft:Equal; Writing – review & editing:Lead
